# Supplementary material for: Retinal expression of small non-coding RNAs in a murine model of proliferative retinopathy
Source: PubMed Central journal article supplement (PMC5032015; doi:10.1038/srep33947), 2016-09-22
Supplement: srep33947-s1.pdf [file srep33947-s1.pdf]

## Supporting Information

### Retinal expression of small non-coding RNAs in a murine model of proliferative retinopathy

Chi-Hsiu Liu<sup>1</sup>, Zhongxiao Wang<sup>1</sup>, Ye Sun<sup>1</sup>, John Paul SanGiovanni<sup>2</sup>, Jing Chen<sup>1, \*</sup>

<sup>1</sup>Department of Ophthalmology, Boston Children's Hospital, Harvard Medical School, Boston, Massachusetts 02115, USA; <sup>2</sup>Section on Nutritional Neuroscience, National Institute on Alcohol Abuse and Alcoholism, Bethesda, MD 20892, USA,

\*Corresponding author: Jing Chen, email: [jing.chen@childrens.harvard.edu](mailto:jing.chen@childrens.harvard.edu)

### Supplementary information — Additional detailed methods:

#### Identification of Genes Differentially Expressed in Human Retinal Specimens with Pathologic Angiogenesis of the Retinal and Choroidal Vasculature

We used extant comparative transcriptomic profiles from retinal specimens containing: 1) active and quiescent fibrovascular membranes (FVMs) donated by people with proliferative diabetic retinopathy (PDR)<sup>1</sup>; and, 2) choroidal neovascular (CNV) membranes donated by people with neovascular age-related macular degeneration (NV AMD)<sup>2</sup> to search for overlap with constructs containing strong experimental evidence of interaction with the 17 OIR-responsive miRNAs. FVM-PDR and CNV-NV AMD candidate molecules were derived from comparison of findings from age-matched disease-free retinas. Microarray expression data were downloaded from Gene Expression Omnibus (GEO), GSE60436 and GSE29801 for PDR and AMD samples respectively.

FVM-PDR Specimens.<sup>1</sup> The PDR-related retinal transcriptome was identified through multi-dimensional false-discovery control procedures (FDR2D) on normalized microarray data that showed differential expression in diseased tissue at  $Q$ -values  $\leq 0.15$ . Analysis included specimens from 9 eyes (3 active FVMs, 3 inactive FVMs, and 3 healthy retinas). FVMs were classified as active if perfused preretinal capillaries existed. Inactive FVMs were defined as those with: 1) previously documented active proliferation that had regressed fully; or 2) only nonperfused, gliotic, or fibrotic vessels. The human WG-6 V3 Expression BeadChips (Illumina, San Diego, CA, USA) microarray platform was run on the 250 ng of isolated total RNA was converted to biotinylated-cRNA. Normalized values were calculated with GeneSpring GX 11.0 software (Agilent Technologies, Santa Clara, CA, USA).

There were 87 and 89 respective genes expressed at significantly higher and lower levels in FVMs (vs. disease-free specimens). There were 91 and 89 respective genes with over and under expression within active (vs. inactive) FVMs<sup>1</sup>.

CNV-NV AMD Specimens.<sup>2</sup> The NV AMD-related transcriptome was identified through permutation testing with the Fisher-Yates method – genes that showed FDR values  $\leq 0.02$ , permuted  $P$  values  $\leq 0.1$ , and fold-change  $\geq 1.5$  were identified as candidates for classification into NV AMD-related modules (gene groups that exhibited coordinated expression in NV AMD and functional enrichment in one or more biological processes). Analyses were conducted on normalized values reported from specimens of RPE-choroid and retina from 31 normal and 4 NV AMD human donor eyes with the Agilent Whole Human Genome  $4 \times 44$  K *in situ* oligonucleotide array platform (G4112F, Agilent Technologies, Inc., Santa Clara, CA, USA). The NV AMD phenotype was defined as AREDS Level 4 and Rotterdam Grade 4. The comparison group had not patent cardinal features of AMD.

There were 391 and 310 respective genes of NV AMD-associated coordinated expression modules expressed at significantly higher and lower levels in the neural retina of people with CNV (vs. disease-free specimens). There were 206 and 96 respective genes with over and under expression within the RPE/choroid of people with CNV (vs. disease-free specimens)<sup>2</sup>.

Functional Annotation were performed with GeneCodis3<sup>3</sup> and the PANTHER Overrepresentation Test (release 20160321, <http://geneontology.org/>) for additional functional annotations from the Gene Ontology Consortium resource center.

## Supplementary information — References:

- 1 Ishikawa, K. *et al.* Microarray analysis of gene expression in fibrovascular membranes excised from patients with proliferative diabetic retinopathy. *Investigative ophthalmology & visual science* **56**, 932-946, doi:10.1167/iovs.14-15589 (2015).
- 2 Newman, A. M. *et al.* Systems-level analysis of age-related macular degeneration reveals global biomarkers and phenotype-specific functional networks. *Genome medicine* **4**, 16, doi:10.1186/gm315 (2012).
- 3 Tabas-Madrid, D., Nogales-Cadenas, R. & Pascual-Montano, A. GeneCodis3: a non-redundant and modular enrichment analysis tool for functional genomics. *Nucleic acids research* **40**, W478-483, doi:10.1093/nar/gks402 (2012).
- 4 Shen, J. *et al.* MicroRNAs regulate ocular neovascularization. *Molecular therapy : the journal of the American Society of Gene Therapy* **16**, 1208-1216, doi:10.1038/mt.2008.104 (2008).

## Number of Supplemental Tables: 3

**Supplementary information — Tables****Table S1. Enrichment Analysis of Pertinent Experimentally Verified Targets of OIR-responsive miRNAs in Biological Process**

| <b>GO ID</b> | <b>Term</b>                                                          | <b>P value</b> | <b>Genes</b>                                    |
|--------------|----------------------------------------------------------------------|----------------|-------------------------------------------------|
| GO:0007596   | Blood coagulation                                                    | 0.000127       | <i>FGG,ANGPT2,IRF1,MMP1,DOCK1,IGF1,SERPINE1</i> |
| GO:0045944   | Positive regulation of transcription from RNA polymerase II promoter | 0.000152       | <i>LEF1,SOX4,IGF2,SOX2,IRF1,IGF1,ETS1</i>       |
| GO:0007275   | Multicellular organismal development                                 | 0.001358       | <i>IGF2,SOX2,ITGB8,ANGPT2,NOTCH3,NDRG2,MNT</i>  |
| GO:0007165   | Signal transduction                                                  | 0.002269       | <i>MYO10,FGG,ANGPT2,NDRG2,RASD1,DOCK1,IGF1</i>  |
| GO:0008285   | Negative regulation of cell proliferation                            | 0.000148       | <i>SOX4,CDKN1A,MNT,IGF1,CDK6,ETS1</i>           |
| GO:0008284   | Positive regulation of cell proliferation                            | 0.000123       | <i>LEF1,SOX4,IGF2,IGF1,ETS1,CTGF</i>            |
| GO:0007155   | Cell adhesion                                                        | 0.000809       | <i>LEF1,CDH2,ITGB8,CD34,CTGF,COL5A1</i>         |
| GO:0006355   | Regulation of transcription, DNA-dependent                           | 0.013481       | <i>SOX4,ARID3B,IGF2,SOX2,NOTCH3,MNT</i>         |
| GO:0045893   | Positive regulation of transcription, DNA-dependent                  | 0.001817       | <i>LEF1,SOX4,SOX2,IGF1,ETS1</i>                 |
| GO:0043410   | Positive regulation of MAPK cascade                                  | 9.05E-05       | <i>IGF2,CDH2,SOX2,IGF1</i>                      |
| GO:0014070   | Response to organic cyclic compound                                  | 0.000346       | <i>LEF1,CDKN1A,ANGPT2,CTGF</i>                  |
| GO:0043066   | Negative regulation of apoptotic process                             | 0.002383       | <i>LEF1,SOX4,CDKN1A,SERPINE1</i>                |
| GO:0007411   | Axon guidance                                                        | 0.003115       | <i>MYO10,COL4A2,DOCK1,COL5A1</i>                |
| GO:0048146   | Positive regulation of fibroblast proliferation                      | 0.000507       | <i>CDKN1A,IGF1,CDK6</i>                         |
| GO:0001649   | Osteoblast differentiation                                           | 0.000598       | <i>LEF1,IGF2,SOX2</i>                           |
| GO:0031100   | Organ regeneration                                                   | 0.000902       | <i>LEF1,CDKN1A,ANGPT2</i>                       |
| GO:0090090   | Negative regulation of canonical WNT receptor signaling pathway      | 0.001265       | <i>LEF1,CDH2,SOX2</i>                           |
| GO:0045766   | Positive regulation of angiogenesis                                  | 0.001112       | <i>ANGPT2,SERPINE1,ETS1</i>                     |
| GO:0009611   | Response to wounding                                                 | 0.001112       | <i>SOX2,ETS1,CTGF</i>                           |
| GO:0002576   | Platelet degranulation                                               | 0.001574       | <i>FGG,IGF1,SERPINE1</i>                        |
| GO:0032355   | Response to estradiol stimulus                                       | 0.001778       | <i>IGF2,ETS1,CTGF</i>                           |
| GO:0016477   | Cell migration                                                       | 0.002402       | <i>CDH2,DOCK1,COL5A1</i>                        |
| GO:0050900   | Leukocyte migration                                                  | 0.002388       | <i>ANGPT2,CD34,MMP1</i>                         |
| GO:0007050   | Cell cycle arrest                                                    | 0.003454       | <i>CDKN1A,SOX2,CDK6</i>                         |
| GO:0001501   | Skeletal system development                                          | 0.003663       | <i>SOX4,IGF2,IGF1</i>                           |
| GO:0030168   | Platelet activation                                                  | 0.009971       | <i>FGG,IGF1,SERPINE1</i>                        |
| GO:0006366   | Transcription from RNA polymerase II promoter                        | 0.010967       | <i>IRF1,MNT,ETS1</i>                            |
| GO:0000278   | Mitotic cell cycle                                                   | 0.011857       | <i>CDKN1A,CKAP5,CDK6</i>                        |
| GO:0031017   | Exocrine pancreas development                                        | 0.001174       | <i>IGF2,IGF1</i>                                |
| GO:0021542   | Dentate gyrus development                                            | 0.001191       | <i>LEF1,CDK6</i>                                |

**Table S2. Enrichment Analysis of Pertinent Experimentally Verified Targets of OIR-responsive miRNAs in Kyoto Encyclopedia of Genes and Genomes (KEGG) database**

| <b>KEGG ID</b> | <b>Pathway</b>                                  | <b>P value</b> | <b>Genes</b>                                       |
|----------------|-------------------------------------------------|----------------|----------------------------------------------------|
| Kegg:05200     | Pathways in cancer                              | 4.79E-08       | <i>CDK6,LEF1,IGF1,COL4A2,ETS1,FADD,CDKN1A,MMP1</i> |
| Kegg:04510     | Focal adhesion                                  | 2.68E-05       | <i>DOCK1,IGF1,COL4A2,COL5A1,ITGB8</i>              |
| Kegg:04115     | p53 signaling pathway                           | 1.64E-05       | <i>CDK6,IGF1,SERPINE1,CDKN1A</i>                   |
| Kegg:04514     | Cell adhesion molecules                         | 0.001443       | <i>CD34,CDH2,ITGB8</i>                             |
| Kegg:05412     | Arrhythmogenic right ventricular cardiomyopathy | 0.000488       | <i>LEF1,CDH2,ITGB8</i>                             |
| Kegg:04512     | ECM-receptor interaction                        | 0.000636       | <i>COL4A2,COL5A1,ITGB8</i>                         |
| Kegg:05215     | Prostate cancer                                 | 0.000639       | <i>LEF1,IGF1,CDKN1A</i>                            |
| Kegg:05218     | Melanoma                                        | 0.000516       | <i>CDK6,IGF1,CDKN1A</i>                            |
| Kegg:05214     | Glioma                                          | 0.00047        | <i>CDK6,IGF1,CDKN1A</i>                            |
| Kegg:04610     | Complement and coagulation cascades             | 0.008789       | <i>FGG,SERPINE1</i>                                |
| Kegg:05160     | Hepatitis C                                     | 0.02032        | <i>CDKN1A,IRF1</i>                                 |
| Kegg:05410     | Hypertrophic cardiomyopathy                     | 0.011109       | <i>IGF1,ITGB8</i>                                  |
| Kegg:04974     | Protein digestion and absorption                | 0.010789       | <i>COL4A2,COL5A1</i>                               |
| Kegg:04810     | Regulation of actin cytoskeleton                | 0.045826       | <i>DOCK1,ITGB8</i>                                 |
| Kegg:04320     | Dorso-ventral axis formation                    | 0.001463       | <i>ETS1,NOTCH3</i>                                 |
| Kegg:05414     | Dilated cardiomyopathy                          | 0.011508       | <i>IGF1,ITGB8</i>                                  |
| Kegg:05219     | Bladder cancer                                  | 0.004026       | <i>CDKN1A,MMP1</i>                                 |
| Kegg:04110     | Cell cycle                                      | 0.01835        | <i>CDK6,CDKN1A</i>                                 |
| Kegg:05222     | Small cell lung cancer                          | 0.010918       | <i>CDK6,COL4A2</i>                                 |
| Kegg:05142     | Chagas disease<br>(American trypanosomiasis)    | 0.013435       | <i>SERPINE1,FADD</i>                               |
| Kegg:05220     | Chronic myeloid leukemia                        | 0.0102         | <i>CDK6,CDKN1A</i>                                 |
| Kegg:05146     | Amoebiasis                                      | 0.013435       | <i>COL4A2,COL5A1</i>                               |

**Table S3. Expression of Selected Retinal miRNAs at Different Time Points in the Mouse OIR model**

| <b>Time Point</b>                 | <b>P15 (Shen et al.<sup>4</sup>)</b> | <b>P17</b>                          |
|-----------------------------------|--------------------------------------|-------------------------------------|
| <b>Mouse Strain</b>               | C57BL/6                              | C57BL/6J                            |
| <b>Platform/Supplier of Array</b> | LC Sciences Microarray Service       | Affymetrix GeneChip miRNA 2.0 array |
| <b>Up-regulated miRNA</b>         | <i>miR-451</i>                       | <i>miR-351</i>                      |
|                                   | <i>miR-214</i>                       | <i>miR-762</i>                      |
|                                   | <i>miR-424</i>                       | <i>miR-210</i>                      |
|                                   | <i>miR-199a</i>                      | <i>miR-145</i>                      |
|                                   | <i>miR-146</i>                       | <i>miR-486</i>                      |
|                                   | <i>miR-106a</i>                      | <i>miR-339</i>                      |
|                                   | <i>miR-350</i>                       | <i>miR-34c</i>                      |
|                                   | <i>miR-210</i>                       | <i>miR-155</i>                      |
| <b>Down-regulation miRNA</b>      | <i>miR-184</i>                       | <i>miR-129-5p</i>                   |
|                                   | <i>miR-31</i>                        | <i>miR-150</i>                      |
|                                   | <i>miR-150</i>                       | <i>miR-375</i>                      |
|                                   | <i>miR-409</i>                       | <i>miR-203</i>                      |
|                                   | <i>miR-375</i>                       | <i>miR-129-3p</i>                   |
|                                   | <i>miR-129-5p</i>                    | <i>miR-449a</i>                     |
|                                   | <i>miR-124a</i>                      | <i>miR-383</i>                      |
|                                   | <i>miR-29a</i>                       | <i>miR-1907</i>                     |
|                                   | <i>miR-129-3p</i>                    | <i>miR-409</i>                      |
